# Supplementary material
Source: Springer Nature journal article supplement (https://www.springermedizin.de/resource/supplementary/12936_2011_1946_MOESM10_ESM.pdf/9542110)
Supplement: MOESM10 [file 9542110]

# ARTESUNAT®

Artesunate 50mg

ARTESUNAT®

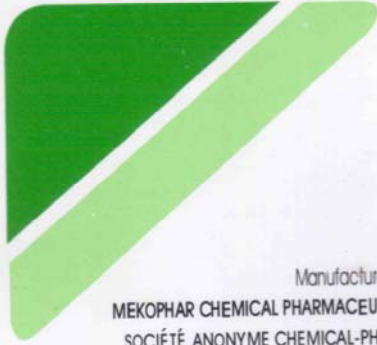

12 Tablets  
12 Comprimés

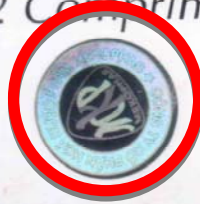

Manufactured by  
MEKOPHAR CHEMICAL PHARMACEUTICAL JOINT-STOCK COMPANY  
SOCIÉTÉ ANONYME CHEMICAL-PHARMACEUTIQUE MEKOPHAR  
297/5 Ly Thuong Kiet St., -Dist, 11-Ho Chi Minh City-Vietnam

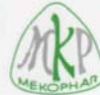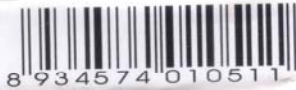

Batch N°/Lot N° : 0170805  
Mfg. Date/Date de fabrication : 08/2005  
Exp. Date/Date d'expiration : 08/2008  
Reg. N°/N° d'enregistrement : VNA-2892-99  
NAFDAC REG. N°: 04-3397

A conserver dans des milieux frais, et secs à l'abri de la lumière

Store in a cool, dry place. Protect from light

Ne pas laisser à la portée des enfants

Always keep out of reach of children

Lire attentivement les instructions avant l'emploi.

Read the directions carefully before use

c/-inclus.

Mode d'emploi : Selon avis du médecin. Lire attentivement le prospectus

Dosage & Administration : As prescribed by physicians. See the enclosed leaflet.

Contre accès aigus de paludisme, Y compris accès aigus de forme cérébrale.  
Indications : Malaria attack and malignant malaria, including cerebral type.

ARTESUNAT®  
Artesunate 50mg

Marketed by: **NEROS PHARMACEUTICALS LTD.,**  
**LAGOS NIGERIA**

ARTESUNAT®
